# Supplementary material for: Response and outcomes after anti-CTLA4 versus anti-PD1 combined with stereotactic body radiation therapy for metastatic non-small cell lung cancer: retrospective analysis of two single-institution prospective trials
Source: PubMed Central journal article supplement — J Immunother Cancer. 2020 Jan 28;8(1):e000492. doi: 10.1136/jitc-2019-000492 (PMC7057428; doi:10.1136/jitc-2019-000492), 2020-01-28
Supplement: jitc-2019-000492supp003.pdf [file jitc-2019-000492supp003.pdf]

**Supplementary Table S1.** Details of toxic effects possibly, probably, or definitely related to protocol therapy in two trials of immunotherapy with radiation therapy

|                           | Anti-CTLA4 |         |         | Anti-PD1  |         |         |
|---------------------------|------------|---------|---------|-----------|---------|---------|
|                           | Grade 1/2  | Grade 3 | Grade 4 | Grade 1/2 | Grade 3 | Grade 4 |
| <b>Pulmonary</b>          |            |         |         |           |         |         |
| Dyspnea                   | 9          | 0       | 0       | 10        | 1       | 0       |
| Pneumonitis               | 1          | 1       | 0       | 2         | 3       | 0       |
| Cough                     | 4          | 0       | 0       | 11        | 0       | 0       |
| Atelectasis               | 0          | 0       | 0       | 0         | 1       | 0       |
| Hemoptysis                | 0          | 0       | 0       | 1         | 0       | 0       |
| Pleural effusion          | 0          | 1       | 0       | 1         | 1       | 0       |
| Lung infection            | 1          | 2       | 0       |           | 1       | 0       |
| <b>Gastrointestinal</b>   |            |         |         |           |         |         |
| Nausea                    | 5          | 0       | 0       | 8         | 0       | 0       |
| Anorexia                  | 3          | 0       | 0       | 2         | 0       | 0       |
| Diarrhea                  | 4          | 2       | 0       | 3         | 0       | 0       |
| Dysphagia                 | 1          | 1       | 0       | 3         | 2       | 0       |
| ALT increased             | 1          | 0       | 0       |           | 0       | 0       |
| Colitis                   | 1          | 2       | 0       | 1         | 0       | 0       |
| Constipation              | 8          | 0       | 0       |           | 0       | 0       |
| Vomit                     | 2          | 0       | 0       | 2         | 0       | 0       |
| Perforation               | 0          | 1       | 0       |           | 0       | 0       |
| <b>Hematologic</b>        |            |         |         |           |         |         |
| Hyponatremia              | 1          | 0       | 0       | 3         | 0       | 0       |
| Hyperkalemia              | 2          | 0       | 0       | 1         | 0       | 0       |
| Hypokalemia               | 0          | 0       | 0       | 1         | 0       | 0       |
| Neutropenia               | 0          | 0       | 0       | 0         | 1       | 0       |
| Anemia                    | 3          | 0       | 1       | 5         | 2       | 0       |
| Leukocytosis              | 1          | 0       | 0       | 0         | 1       | 0       |
| Sepsis                    | 0          | 0       | 0       | 0         | 0       | 2       |
| Thromboembolic event      | 0          | 1       | 0       | 0         | 0       | 0       |
| Hypertension              | 1          | 0       | 0       | 2         | 1       | 0       |
| Blood bilirubin increased | 0          | 1       | 0       | 0         | 0       | 0       |
| Platelet count decreased  | 0          | 0       | 0       | 0         | 1       | 0       |
| <b>Skin</b>               |            |         |         |           |         |         |
| Rash                      | 4          | 0       | 0       | 7         | 2       | 0       |
| Erythema Multiform        | 1          | 0       | 0       | 1         | 0       | 0       |
| Muscle disorder           |            | 1       | 0       | 0         | 0       | 0       |
| Pruritus                  | 5          | 0       | 0       | 0         | 0       | 0       |
| Skin Ulceration           | 0          | 0       | 0       | 1         | 0       | 0       |
| <b>Other</b>              |            |         |         |           |         |         |
| Fatigue                   | 9          | 2       | 0       | 0         | 0       | 0       |
| Myalgia                   | 2          | 0       | 0       | 0         | 0       | 0       |

---

|                        |    |   |   |   |   |   |
|------------------------|----|---|---|---|---|---|
| Arthralgia             | 4  | 1 | 0 | 0 | 0 | 0 |
| Fracture               | 0  | 0 | 0 | 1 | 0 | 0 |
| Neuralgia              | 1  | 1 | 0 | 0 | 0 | 0 |
| Pain                   | 10 | 3 | 0 | 0 | 0 | 0 |
| Fever                  | 3  | 0 | 0 | 0 | 0 | 0 |
| Myocardial infarction  | 0  | 1 | 0 | 0 | 0 | 0 |
| Atrial fibrillation    | 0  | 1 | 0 | 0 | 0 | 0 |
| Endocrine disorders    | 0  | 1 | 0 | 0 | 0 | 0 |
| Cholecystitis          | 0  | 1 | 0 | 0 | 0 | 0 |
| Blurred vision         | 0  | 1 | 0 | 0 | 0 | 0 |
| Endocarditis infective | 0  | 1 | 0 | 0 | 0 | 0 |
| Dehydration            | 0  | 1 | 0 | 0 | 0 | 0 |
| Muscle weakness        | 0  | 1 | 0 | 0 | 0 | 0 |
| Weight Loss            | 2  | 1 | 0 | 2 | 1 | 0 |

---

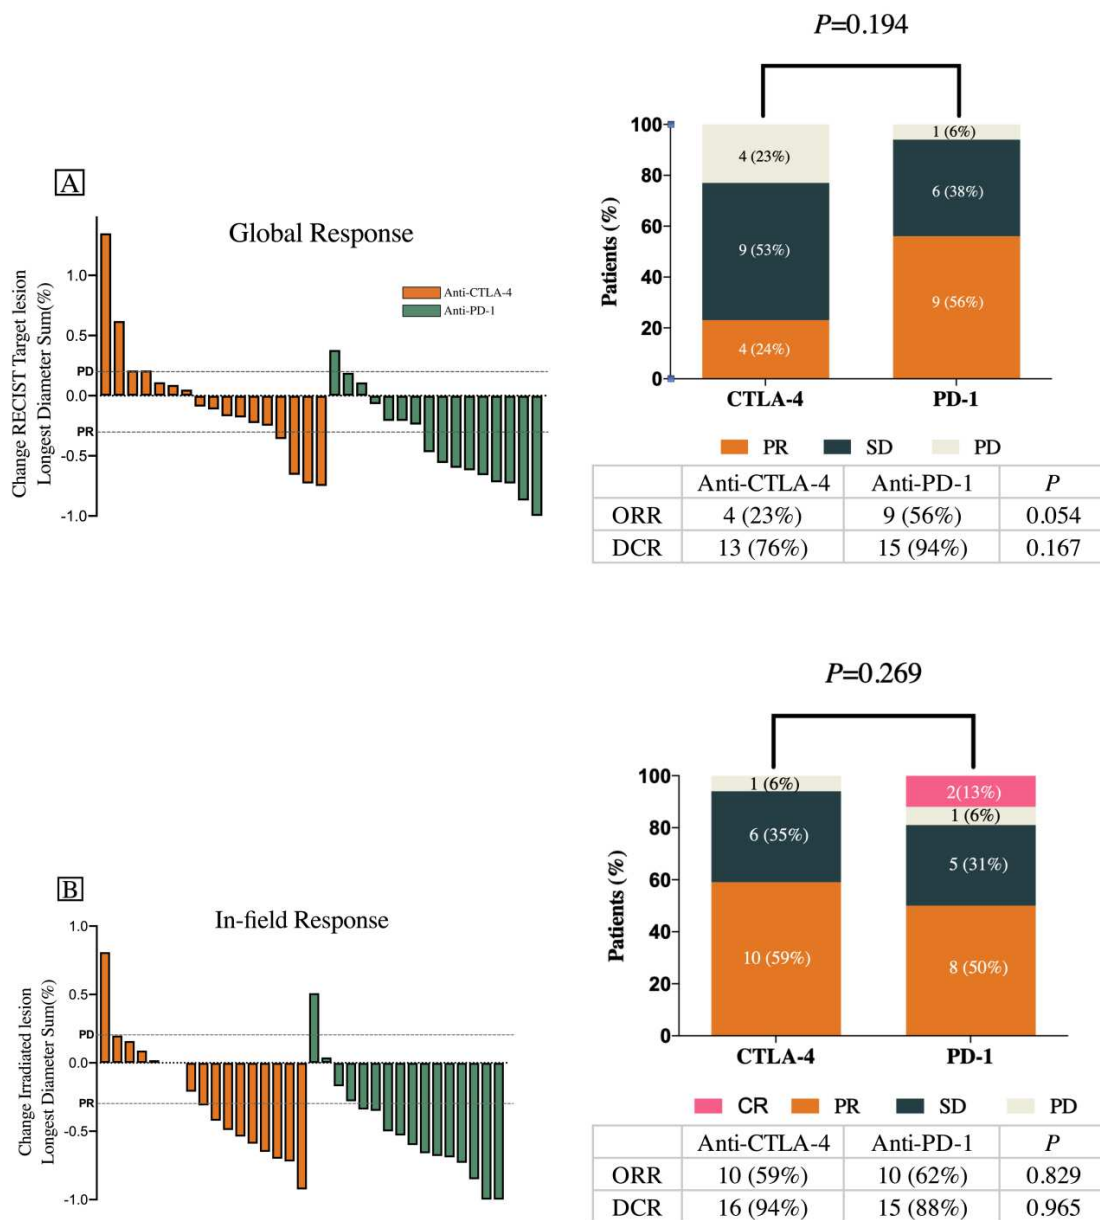

**Supplementary Figure S1.** Best overall response waterfall and distribution plots. Maximum percent change and response evaluation in (A) the aggregate diameter of Response Evaluation Criteria in Solid Tumors (RECIST) target metastases and (B) the irradiated lesions.
